# Supplementary material
Source: publisher figshare collection journal article supplement (https://sage.figshare.com/ndownloader/files/15658343)
Supplement: Supplementary file 1 [file 15658343]

# Screens, Teens and Psychological Well-Being: Evidence from three time-use diary studies

Supplementary Materials

Amy Orben and Andrew K. Przybylski

| <b>Page</b> | <b>Description</b>                                                                                                                                                 |
|-------------|--------------------------------------------------------------------------------------------------------------------------------------------------------------------|
| 2           | <b>Strengths and difficulties Questionnaire</b><br>Detailed items participants completed in the Strengths and Difficulties Questionnaire                           |
| 3           | <b>PSID Children’s Depression Inventory</b><br>Detailed items participants completed in the PSID Children’s Depression Inventory                                   |
| 4           | <b>Additional Significance Tests</b><br>This section gives details about the additional significance test results we did not include in the main body manuscripts. |
| 5           | <b>Real-Life Measure</b><br>Details about how real-life measure of social media use in discussion section was calculated.                                          |

Version 2: with correction (replacing “Short Mood and Feelings Questionnaire” with “Children’s Depression Inventory”)

## Strengths and Difficulties Questionnaire

|                                                                     | Not True | Somewhat True | Certainly True |
|---------------------------------------------------------------------|----------|---------------|----------------|
| Considerate of other people's feelings                              |          |               |                |
| Restless, overactive, cannot stay still for long                    |          |               |                |
| Often complains of headaches, stomach-aches or sickness             |          |               |                |
| Shares readily with other children (treats, toys, pencils etc.)     |          |               |                |
| Often has temper tantrums or hot tempers                            |          |               |                |
| Rather solitary, tends to play alone                                |          |               |                |
| Generally obedient, usually does what adults request                |          |               |                |
| Many worries, often seems worried                                   |          |               |                |
| Helpful if someone is hurt, upset or feeling ill                    |          |               |                |
| Constantly fidgeting or squirming                                   |          |               |                |
| Has at least one good friend                                        |          |               |                |
| Often fights with other children or bullies them                    |          |               |                |
| Often unhappy, down-hearted or tearful                              |          |               |                |
| Generally like by other children                                    |          |               |                |
| Easily distracted, concentration wanders                            |          |               |                |
| Nervous or clingy in new situations, easily loses confidence        |          |               |                |
| Kind to younger children                                            |          |               |                |
| Often lies or cheats                                                |          |               |                |
| Picked on or bullied by other children                              |          |               |                |
| Often volunteers to help others (parents, teachers, other children) |          |               |                |
| Thinks things out before acting                                     |          |               |                |
| Steals from home, school or elsewhere                               |          |               |                |
| Gets on better with adults than with other children                 |          |               |                |
| Many fears, easily scared                                           |          |               |                |
| Sees tasks through to the end, good attention span                  |          |               |                |

## PSID Children's Depression Inventory

"For this next set of items, choose the number next to the statement that best describes how you have felt during the last two weeks. We'll begin on page 18. Can you tell me the question number that appears at the top of that page?"

Select the number next to the sentence from the group that best describes your feelings during the last two weeks."

|                                   |                                              |                                    |
|-----------------------------------|----------------------------------------------|------------------------------------|
| I am sad once in a while          | I am sad many times                          | I am sad all the time              |
| Nothing will ever work out for me | I am not sure if things will work out for me | Things will work out for me        |
| I do most things O.K              | I do many things O.K                         | I do everything wrong              |
| I hate myself                     | I do not like myself                         | I like myself                      |
| I feel like crying everyday       | I feel like crying many days                 | I feel like crying once in a while |
| Things bother me all the time     | Things bother me many times                  | Things bother me once in a while   |
| I look O.K                        | There are some bad things about my looks     | I look ugly                        |
| I do not feel alone               | I feel alone many times                      | I feel alone all the time          |
| I have plenty of friends          | I have some friends, but I wish I had more   | I do not have any friends          |
| Nobody really loves me            | I am not sure if anybody loves me            | I am sure that somebody loves me   |

### Additional Significance Tests

Here we detail additional significance tests that we did not include in the main body manuscript. This includes measuring the significance of a SCA by examining the proportion of results in the dominant direction for the original and bootstrapped SCA.

*SCA Results (Table 2)*

| Technology Measure      | GUI                             |                 | PSID                            |                 | MCS                             |                 | Aggregated |
|-------------------------|---------------------------------|-----------------|---------------------------------|-----------------|---------------------------------|-----------------|------------|
|                         | # results in dominant direction | <i>p</i> -value | # results in dominant direction | <i>p</i> -value | # results in dominant direction | <i>p</i> -value |            |
| Self-Report             | 4                               | .13             | 2                               | 1               | 5                               | .24             | 11         |
| Participation (Weekday) | 3                               | .68             | 3                               | .63             | 6                               | .03             | 10         |
| Participation (Weekend) | 4                               | .11             | 2                               | 1               | 4                               | .73             | 10         |
| Time Spent (Weekday)    | 4                               | .13             | 4                               | .14             | 6                               | .04             | 14         |
| Time Spent (Weekend)    | 4                               | .13             | 3                               | .63             | 4                               | .67             | 11         |
| < 30 min (Weekday)      | 4                               | .13             | 2                               | 1               | 5                               | .23             | 7          |
| < 30 min (Weekend)      | 4                               | .12             | 4                               | .12             | 4                               | .73             | 10         |
| < 1 hour (Weekday)      | 2                               | 1               | 2                               | 1               | 5                               | .21             | 9          |
| < 1 hour (Weekend)      | 2                               | 1               | 4                               | .11             | 5                               | .21             | 7          |
| < 2 hours (Weekday)     | 2                               | 1               | 4                               | .13             | 6                               | .03             | 8          |
| < 2 hours (Weekend)     | 2                               | 1               | 4                               | .12             | 5                               | .23             | 7          |

*Confirmatory Results (Table 3)*

| Measure                 | # results in dominant direction | <i>p</i> -value |
|-------------------------|---------------------------------|-----------------|
| Self-Report             | 5/6                             | 0.24            |
| Time Spent              | 10/12                           | 0.04            |
| < 30 Minutes on Weekday | 5/6                             | 0.23            |
| < 1 Hour on Weekday     | 5/6                             | 0.21            |

## **Real-Life Measure of Social Media Effects**

To calculate a 'real-life' measure of social media effects we first examined what sort of effects would be large enough to cause a noticeable difference in an adolescent's wellbeing. We used Norman et al. (2003) inform that any 0.5 Standard Deviation change in self-reported well-being would be counted as a 'noticeable difference'.

We focused on MCS data with time spent on either weekend or weekday as the technology use measure, for ease of calculation.

First we re-ran our SCA models for the MCS (UK) data with all variables standardised except the technology use measure. We took their median (effect = -0.0079). We also examined the most negative specification (effect = -0.45; SDQ, time spent on weekday, no controls).

To obtain how much time an adolescent would need to report spending more on technology to have a 0.5 SD change in their wellbeing we took the absolute value of 0.5 divided by the effect of interest.

If we take the median of all effects of time spent in MCS data we find that this is 63.52 hours. If we take the maximum effect found in the specifications, we find that this decreases to 11.23 hours.
